# Supplementary material for: Saringosterol Acetate from a Popular Edible Seaweed, Hizikia Fusiformis Attenuated Proliferation of Human Lung Adenocarcinoma Epithelial Cells (A549 Cells) via Apoptosis Signaling Pathway
Source: Preprints.org preprint supplement (doi:10.20944/preprints201911.0239.v1), 2019-11-20
Supplement: Supplementary file 1 [file supplementary]

**Highlights**

Anticancer compounds in *Hizikia fusiformis* have not been identified

Saringosterol acetate (SA) were successfully isolated from *H. fusiformis* extract by CPC.

SA induced apoptosis related proteins and sub-G1 phase cell cycle arrest in A549 cell.

SA induces A549 cell apoptosis via a Bid- and caspase-8-dependent pathway
